# Supplementary material
Source: MDPI journal article supplement (https://www.mdpi.com/2073-4352/2/2/306)
Supplement: s1 [file s1]

# Supplementary materials

Responses for the Checkcif level A Alerts:

## Compound 1

\_vrf\_PLAT430\_ALERT\_2\_A

**Problem:** Short Inter D...A Contact S11 ... S26 ... 2.87 Ang.

**Response:** The S11 and S26 atoms do not correspond the same part of the disordered ET molecule. ALERT is generated because S11 belongs to both parts of the disordered molecule. As carbon atoms of the lower fraction of the twin generated disorder cannot be placed, the S26 S11 short distance is considered as intermolecular contact instead of intra-molecular one.

## Compound 2

\_vrf\_REFLT03\_ALERT\_3\_A

**Problem:** Reflection count <85% complete (theta max?)

From the CIF: \_diffn\_reflns\_theta\_max 23.35

From the CIF: \_diffn\_reflns\_theta\_full 23.35

From the CIF: \_reflns\_number\_total 3379

TEST2: Reflns within \_diffn\_reflns\_theta\_max

Count of symmetry unique reflns 4995

Completeness (\_total/calc) 67.65%.

**Response:** The low quality and size of the single crystal of this compound did not allow the collection of enough observed data for precise refinements.

\_vrf\_RFACR01\_ALERT\_3\_A

**Problem:** The value of the weighted R factor is 0.45; Weighted R factor given 0.474.

**Response:** The low quality and size of the single crystal of this compound did not allow the collection of enough observed data for precise refinements.

\_vrf\_PLAT022\_ALERT\_3\_A

**Problem:** Ratio Unique/Expected Reflections (too) Low ... 0.676.

**Response:** The low quality and size of the single crystal of this compound did not allow the collection of enough observed data for precise refinements.

\_vrf\_PLAT029\_ALERT\_3\_A

**Problem:** \_diffn\_measured\_fraction\_theta\_full Low ... 0.676.

**Response:** The low quality and size of the single crystal of this compound did not allow the collection of enough observed data for precise refinements.

\_vrf\_PLAT084\_ALERT\_2\_A

**Problem:** High wR2 Value ... 0.47.

**Response:** The low quality and size of the single crystal of this compound did not allow the collection of enough observed data for precise refinements.

\_vrf\_PLAT201\_ALERT\_2\_A

**Problem:** Isotropic non-H Atoms in Main Residue(s) ... 26.

**Response:** The crystal structure of this compound have been determined and refined with an anisotropic/isotropic mixed model in order to reduce the number of parameters as the number of observed data was too low.

\_vrf\_PLAT241\_ALERT\_2\_A

**Problem:** Check High Ueq as Compared to Neighbors for S7A.

**Problem:** Check High Ueq as Compared to Neighbors for C8A.

**Response:** These atoms correspond to a disordered region of the ET molecule (see isostructural compound 1) that has not been solved due to the poor quality of the data.

### Compound 3

\_vrf\_REFLT03\_ALERT\_3\_A

**Problem:** Reflection count <85% complete (theta max?)

From the CIF: \_diffn\_reflns\_theta\_max 31.78

From the CIF: \_diffn\_reflns\_theta\_full 31.78

From the CIF: \_reflns\_number\_total 42071

TEST2: Reflns within \_diffn\_reflns\_theta\_max

Count of symmetry unique reflns 51928

Completeness (\_total/calc) 81.02%.

**Response:** The low quality and size of the single crystal of this compound did not allow the collection of enough observed data for precise refinements.

\_vrf\_PLAT026\_ALERT\_3\_A

**Problem:** Ratio Observed/Unique Reflections too Low ... 10 Perc.

**Response:** The low quality and size of the single crystal of this compound did not allow the collection of enough observed data for precise refinements.

\_vrf\_PLAT029\_ALERT\_3\_A

**Problem:** \_diffn\_measured\_fraction\_theta\_full Low ... 0.810.

**Response:** The low quality and size of the single crystal of this compound did not allow the collection of enough observed data for precise refinements

\_vrf\_PLAT201\_ALERT\_2\_A

**Problem:** Isotropic non-H Atoms in Main Residue(s) ... 116.

**Response:** The crystal structure of this compound have been determined and refined with an anisotropic/isotropic mixed model in order to reduce the number of parameters as the number of observed data was too low.

\_vrf\_PLAT312\_ALERT\_2\_A

**Problem:** Strange C-O-H Geometry (C-O .LT. 1.25 Ang) ... O2.

**Response:** O2 anisotropic displacement parameters show a strong elongation along one direction suggesting a 2 positions disorder that could not been solved due to the poor quality of the data.

\_vrf\_PLAT360\_ALERT\_2\_A

**Problem:** Short C(sp<sup>3</sup>)-C(sp<sup>3</sup>) Bond C38–C39 ... 1.23 Ang.

**Response:** These atoms correspond to a disordered region of the tcnO<sup>−</sup> anion that could not been solved due to the poor quality of the data.

© 2012 by the authors; licensee MDPI, Basel, Switzerland. This article is an open access article distributed under the terms and conditions of the Creative Commons Attribution license (<http://creativecommons.org/licenses/by/3.0/>).
